# Supplementary material for: Aggressiveness of Localized Prostate Cancer: the Key Value of Testosterone Deficiency Evaluated by Both Total and Bioavailable Testosterone: AndroCan Study Results
Source: Springer Nature journal article supplement (doi:10.1007/s12672-018-0351-8), 2018-10-06
Supplement: MOESM1 [file 16179684]

**Key of Definitions for Abbreviations**

BT: Bioavailable testosterone

DHEA: Dehydroepiandrosterone

DHEA-S: DHEA sulfate

DHT: Dihydrotestosterone

∆4: Androstenedione, D4

∆5: Androstenediol, D5

E1: Estrone

E2: Estradiol

FSH: Follicle−stimulating hormone

FT: Free testosterone

GC-MS: Gas chromatography-mass spectrometry

HGPC: High-grade prostatic cancer

HIFU: High intensity focalized ultrasound

LH: luteinizing hormone

PCa: Prostate cancer

prdGP: Predominant Gleason pattern

QoL: Quality of life

RIA: Radioimmunoassay

RP: Radical prostatectomy

SHBG: Sex hormone binding globulin

TT: Total serum testosterone
